# Supplementary material for: Common and metal-specific proteomic responses to cadmium and zinc in the metal tolerant ericoid mycorrhizal fungus Oidiodendron maius Zn
Source: Royal Society of Chemistry journal article supplement (doi:10.1039/c5mt00024f), 2015-01-01
Supplement: c5mt00024f5.pdf [file c5mt00024f5.pdf]

**Table S3.** GO Terms either over- or under-represented in the shotgun proteome of the different treatments, as identified by Fisher's exact test (a)

| Category           | GO-ID      | Term                                              | Control  |          |            | Cadmium  |          |            | Zinc     |          |            |
|--------------------|------------|---------------------------------------------------|----------|----------|------------|----------|----------|------------|----------|----------|------------|
|                    |            |                                                   | FDR      | P-Value  | Over/Under | FDR      | P-Value  | Over/Under | FDR      | P-Value  | Over/Under |
| Cellular Component | GO:0000786 | nucleosome                                        | ---      | ---      | ---        | ---      | ---      | ---        | 0.00605  | 0.000944 | under      |
|                    | GO:0005856 | cytoskeleton                                      | ---      | ---      | ---        | ---      | ---      | ---        | 0.00605  | 0.000944 | under      |
|                    | GO:0000015 | phosphopyruvate hydratase complex                 | ---      | ---      | ---        | ---      | ---      | ---        | 0.000164 | 7.98E-06 | over       |
|                    | GO:0000324 | fungal-type vacuole                               | ---      | ---      | ---        | ---      | ---      | ---        | 0.00605  | 0.000931 | over       |
|                    | GO:0009898 | internal side of plasma membrane                  | ---      | ---      | ---        | ---      | ---      | ---        | 0.000585 | 6.31E-05 | over       |
| Molecular Function | GO:0003677 | DNA binding                                       | ---      | ---      | ---        | ---      | ---      | ---        | 0.00119  | 0.000155 | under      |
|                    | GO:0005524 | ATP binding                                       | ---      | ---      | ---        | 0.002171 | 0.000157 | over       | 1.2E-07  | 2.22E-09 | under      |
|                    | GO:0008135 | translation factor activity, nucleic acid binding | ---      | ---      | ---        | ---      | ---      | ---        | 0.00749  | 0.00119  | under      |
|                    | GO:0046982 | protein heterodimerization activity               | ---      | ---      | ---        | ---      | ---      | ---        | 0.00605  | 0.000944 | under      |
|                    | GO:0003924 | GTPase activity                                   | 0.000713 | 1.56E-05 | under      | 4.84E-05 | 9.39E-07 | over       | 0.00178  | 0.000248 | under      |
|                    | GO:0005525 | GTP binding                                       | 0.000256 | 4.32E-06 | under      | 1.78E-05 | 2.7E-07  | over       | 0.00111  | 0.000137 | under      |
|                    | GO:0000287 | magnesium ion binding                             | ---      | ---      | ---        | ---      | ---      | ---        | 0.000164 | 7.98E-06 | over       |
|                    | GO:0004634 | phosphopyruvate hydratase activity                | ---      | ---      | ---        | ---      | ---      | ---        | 0.000164 | 7.98E-06 | over       |
|                    | GO:0008863 | formate dehydrogenase (NAD+) activity             | ---      | ---      | ---        | ---      | ---      | ---        | 0.000161 | 6.43E-06 | over       |
|                    | GO:0051287 | NAD binding                                       | ---      | ---      | ---        | ---      | ---      | ---        | 6.26E-06 | 1.9E-07  | over       |
|                    | GO:0030060 | L-malate dehydrogenase activity                   | 0.004285 | 0.000148 | over       | ---      | ---      | ---        | 0.00122  | 0.000163 | over       |
|                    | GO:0003746 | translation elongation factor activity            | ---      | ---      | ---        | 0.002799 | 0.000205 | over       | ---      | ---      | ---        |
|                    | GO:0004365 | glyceraldehyde-3-phosphate dehydrogenase activity | ---      | ---      | ---        | 1.78E-05 | 1.7E-07  | under      | ---      | ---      | ---        |
|                    | GO:0050661 | NADP binding                                      | ---      | ---      | ---        | 5.08E-05 | 1.03E-06 | under      | ---      | ---      | ---        |
|                    | GO:0051082 | unfolded protein binding                          | 0.00883  | 0.00032  | under      | ---      | ---      | ---        | ---      | ---      | ---        |
| Biological Process | GO:0006334 | nucleosome assembly                               | ---      | ---      | ---        | ---      | ---      | ---        | 0.00119  | 0.000155 | under      |
|                    | GO:0006412 | translation                                       | ---      | ---      | ---        | ---      | ---      | ---        | 0.00788  | 0.00127  | under      |
|                    | GO:0006457 | protein folding                                   | ---      | ---      | ---        | ---      | ---      | ---        | 0.00194  | 0.000275 | under      |
|                    | GO:0006950 | response to stress                                | ---      | ---      | ---        | ---      | ---      | ---        | 0.000164 | 0.000008 | under      |
|                    | GO:0006184 | GTP catabolic process                             | 0.000713 | 1.56E-05 | under      | 4.84E-05 | 9.39E-07 | over       | 0.00178  | 0.000248 | under      |
|                    | GO:0006094 | gluconeogenesis                                   | ---      | ---      | ---        | ---      | ---      | ---        | 0.000521 | 4.17E-05 | over       |
|                    | GO:0006096 | glycolysis                                        | ---      | ---      | ---        | 1.78E-05 | 2.62E-07 | under      | 0.000161 | 6.52E-06 | over       |
|                    | GO:0032889 | regulation of vacuole fusion, non-autophagic      | ---      | ---      | ---        | ---      | ---      | ---        | 0.000585 | 6.31E-05 | over       |
|                    | GO:0006099 | tricarboxylic acid cycle                          | 0.002775 | 8.66E-05 | over       | ---      | ---      | ---        | 0.000759 | 8.57E-05 | over       |
|                    | GO:0006108 | malate metabolic process                          | 0.004285 | 0.000148 | over       | ---      | ---      | ---        | 0.00122  | 0.000163 | over       |
|                    | GO:0044262 | cellular carbohydrate metabolic process           | 0.001769 | 4.1E-05  | over       | ---      | ---      | ---        | 0.00202  | 0.000292 | over       |
|                    | GO:0006414 | translational elongation                          | ---      | ---      | ---        | 0.009527 | 0.000747 | over       | ---      | ---      | ---        |
|                    | GO:0044267 | cellular protein metabolic process                | 0.000652 | 1.26E-05 | under      | ---      | ---      | ---        | ---      | ---      | ---        |

(a) GO Terms terms under-represented in the specific treatment are shaded in red, those over-represented are shaded in green
